1 **Symbiont-conferred immunity interacts with the effects of**  
2 **parasitoid genotype and intraguild predation to shape pea aphid**  
3 **immunity in a clone-specific fashion**

4  
5  
6

7 Samuel Alexander Purkiss<sup>a</sup>, Mouhammad Shadi Khudr<sup>a</sup>, Oscar Enrique Aguinaga<sup>b</sup>, Reinmar Hager<sup>a</sup>

8  
9

10 <sup>a</sup> School of Biological Sciences, Faculty of Biology, Medicine and Health, Manchester Academic Health  
11 Science Centre, The University of Manchester, M13 9PT, Manchester, UK

12 <sup>b</sup> Departamento de Ingeniería, Facultad de Ciencias y Filosofía, Universidad Peruana Cayetano Heredia, Lima,  
13 Peru

14 Corresponding author: Reinmar Hager

15

16 \*Equal contribution.

17

18 **Statement of contribution**

19 **MSK** conceived the work, analysed and visualised the data. **MSK, SAP, OEA, RH** designed the research.  
20 **SAP, MSK, OEA** performed the research. **SAP** contributed reagents and analytical tools. **SAP, MSK, RH** wrote  
21 the manuscript. All authors approved the manuscript final draft.

22  
23  
24  
25  
26  
27  
28

29 **Abstract**

30 Host-parasite interactions represent complex co-evolving systems in which genetic variation within a species  
31 can significantly affect selective pressure on traits in the other (for example via inter-species indirect genetic  
32 effects). While often viewed as a two-species interaction between host and parasite species, some systems  
33 are more complex due to the involvement of symbionts in the host that influence its immunity, enemies of the  
34 host, and the parasite through intraguild predation. However, it remains unclear what the joint effects of  
35 intraguild predation, defensive endosymbiosis, within-species genetic variation and indirect genetic effects on  
36 host immunity are. We have addressed this question in an important agricultural pest system, the pea aphid  
37 *Acyrtosiphon pisum*, which shows significant intraspecific variability in immunity to the parasitoid wasp  
38 *Aphidius ervi* due to immunity conferring endosymbiotic bacteria. In a complex experiment involving a  
39 quantitative genetic design of the parasitoid, two ecologically different aphid lineages and the aphid lion  
40 *Chrysoperla carnea* as an intraguild predator, we demonstrate that aphid immunity is affected by intraspecific  
41 genetic variation in the parasitoid and the aphid, as well as by associated differences in the defensive  
42 endosymbiont communities. Using 16s rRNA sequencing, we identified secondary symbionts that differed  
43 between the lineages. We further show that aphid lineages differ in their altruistic behaviour once parasitised  
44 whereby infested aphids move away from the clonal colony to facilitate predation. The outcome of these  
45 complex between-species interactions not only shape important host-parasite systems but have also  
46 implications for understanding the evolution of multitrophic interactions, and aphid biocontrol.

47

48

49 **Keywords**

50 Intraspecific genetic variation effects, inter-species indirect genetic effects, intraguild predation, indirect  
51 ecological effects, pea aphid, endosymbiont, host-parasite system

52

53

54 **1. Introduction**

55 Natural ecosystem dynamics and their evolution are driven by complex interactions of selective pressures on  
56 interacting species caused by both environmental and within-species genetic variation e.g. [1]. A textbook  
57 example extensively investigated at a theoretical and empirical level is the interaction between hosts and  
58 parasites. Here, the fitness of a parasite is dependent on its host and, despite a vast range of evolved anti-  
59 parasite responses; organisms continue to be successfully parasitised [2]. Parasites often manipulate their  
60 hosts to improve their fitness [3] through e.g. promoting predator avoidance responses in the host, increasing  
61 its likelihood of survival [4]. Particularly complex interactions often occur in parasitoidism, a process that  
62 represents aspects of parasitism and predation. Complete parasitoidism occurs when the larva of the  
63 parasitoid develops within its parasitised host as a parasite. This results eventually in host death through  
64 mummification, where only the exoskeleton remains after parasitoid emergence [5,6]. An important example  
65 of a parasitoid is the hymenopteran endoparasitoid *Aphidius ervi* (Haliday), which is widely used as a biological  
66 control agent of the pea aphid *Acyrtosiphon pisum* (Harris) [7], in which it generally lays only one egg [6].  
67 The co-evolutionary dynamics between antagonist species, such as an aphid host and its parasitoid, may drive  
68 evolution through a process of reciprocal adaptation and counter-adaptation, with selection for the

69 development of resistance in the host and virulence traits in the parasitoid [8,9]. While resistance is widespread  
70 among host species, with evidence for degrees of endogenous resistance in some insect species, resistance  
71 is more often conferred or mediated by specific microbial symbionts [10,11]. Pea aphids show considerable  
72 within-species variability in resistance to the parasitoid *A. ervi* [12,13], and it has recently been shown that this  
73 variation is often explained by different protective symbionts found in different aphid lineages [11,13,14].  
74 Therefore, the natural enemy of the host is an enemy of the symbiont. Lineages of the pea aphid exist in  
75 clonally reproducing populations under temperate favourable conditions, and these clones carry vertically  
76 transmitted (secondary) facultative symbionts in addition to its (primary) obligate symbiont *Buchnera aphidicola*  
77 [15,16]. The primary symbiont provides the aphid with nutrients that are lacking in its diet and that it could not  
78 otherwise produce [15]. Secondary symbionts have been implicated in various functions of aphid biology,  
79 including aiding in host-plant specialisation and particularly resistance to parasitoids [11,15,17].

80  
81 Within-species genetic variability is known to affect both focal and other interacting species and communities  
82 [18, 19] and can be highly influential in determining the dynamics of host-parasitoid systems [20-22]. Further,  
83 indirect genetic effects theory outlines how the genotype of an individual can influence the phenotype of  
84 another individual (e.g. [23,24]), of the same species (indirect genetic effect, IGE) or another species (indirect  
85 interspecies genetic effect, IIGE). In the aphid-parasitoid system, the parasitoid wasp *A. ervi* alters aphid  
86 behaviour by influencing where aphids go to die during wasp larval development [21]. Indeed, such a  
87 behavioural modification of the aphid is influenced by the genotype of the wasp [21] and thus represents an  
88 IIGE [21,25,26]. Therefore, we need to consider the effects of both within-species genetic variability and their  
89 indirect effects when studying complex host-parasite systems.

90  
91 Following the Red Queen hypothesis, interacting species must constantly evolve to maintain their position as  
92 a form of an evolutionary arms race between the species [27], which may result in either reciprocal selective  
93 sweeps [28] or sustained genotype oscillations [29,30]. In a host-parasitoid system, there is an arms race  
94 between host resistance (ability to survive the attack by the parasitoid) and parasitoid virulence (infectivity; the  
95 ability to overcome host defences) [27]. Most experimental examples of such co-evolutionary arms races [31]  
96 have demonstrated these as pairwise interactions between the parasitoid and its host. However, in natural  
97 ecosystems, parasitoids do not only operate in such pair-wise interactions as they are themselves interacting  
98 with other species that, for example, share aphid populations as prey [32,33]. Therefore, we predict that host  
99 and parasite fitness will be significantly affected by the presence of a common enemy such as the aphid lion  
100 larva *Chrysoperla carnea* (Stephens). Aphid lions naturally have an advantage over parasitoid wasps. The  
101 aphid lion can consume both healthy and parasitised aphids (parasitoid puparia), an ecological process known  
102 as intraguild predation (IGP) [33]. This leads to reducing the availability of viable, healthy aphid hosts for the  
103 parasitoid and, concomitantly, indirect reduction of parasitoid fitness [33,34]. In response to parasitoidism,  
104 aphids are known to exhibit altruistic risk-taking behaviour by exposure to predators when parasitised, thus, in  
105 essence, sacrificing the diseased few for the benefit of the genetically identical population (clone) [35,36].

106 Further, the bacterial symbiont, conferring a degree of immunity on the aphid host against its parasitoid  
107 enemy, adds another layer of complexity to the eco-evolutionary dynamics of the species interactions when  
108 intraguild predation occurs as the aphid lion is an enemy to the aphid host, the endosymbiont communities  
109 and the parasitoid. The complex interaction effects between within-species genetic variation of host and

110 parasitoid when intraguild predation occurs may lead to ‘guild or diffuse co-evolution’ rather than pairwise co-  
111 evolution between two species [37,38,39], and may have important evolutionary implications for the pressures  
112 shaping aphid phenotype evolution in multi-trophic systems. To date, no experimental studies of such complex  
113 systems exist.

114 To address this gap in knowledge, we established a population of parasitoid *A. ervi* daughters using a half-sib  
115 quantitative genetic design, *sensu* Khudr *et al.* 2013 [21], and exposed two ecologically distinct lineages of the  
116 pea aphid *A. pisum*, with different defensive endosymbiont communities, to the effects of parasitoid  
117 intraspecific genetic variability to study host immunity with and without the presence of an intraguild predator  
118 (the aphid lion *C. carnea*). We hypothesised that, subject to the intraguild predator, differences in defensive  
119 endosymbiont communities and differences in parasitoid genotype may differentially affect pea aphid  
120 reproductive success and behaviour in a lineage-specific manner.

121

## 122 **2. Materials and Methods**

### 123 *Study organisms*

#### 124 Pea aphids and defensive endosymbiont

125 Two clonal lineages of pea aphid were selected for the experiment, N116 and our Q1 isolate. The N116 aphid  
126 is of the biotype (K) as it was originally isolated from alfalfa *Medicago sativa* (L.) by Dr Julia Ferrari in Berkshire  
127 UK [40]. It has been a laboratory lineage for *ca.* 10 years and was provided to us by Dr Colin Turnbull of  
128 Imperial College London. Q1 is of the biotype (G) [41], which was established from one female of a population  
129 colonising pea plants (*Pisum sativum* L.) isolated from the quadrangle garden of the Faculty of Biology,  
130 Medicine and Health, University of Manchester. The aphids were reared on faba bean *Vicia faba* var minor  
131 (Harz) obtained from a local supplier, Manchester, UK, and maintained at 22-24°C with a photoperiod of 16h  
132 (light) : 8h (dark). These two lineages of pea aphid are ecologically different. N116 is reported to have the  
133 heritable defensive endosymbiont *Hamiltonella defensa* [40,42] that confers relative immunity to parasitoidism.  
134 By contrast, in a pilot study, we established that Q1 was highly susceptible to being parasitoidised. Under  
135 temperate mesic conditions, aphids reproduce through parthenogenesis resulting in populations of genetically  
136 identical individuals.

#### 137 Parasitoid wasp *A. ervi*

138 We purchased 250 mummies of aphids harbouring *A. ervi* developing juveniles from Koppert UK Ltd. Unlike  
139 the non-parasitic males, the females of this solitary koinobiont parasitoid wasp are an efficient natural enemy  
140 and biocontrol agent of pea aphids [33,43]. The female oviposits one egg in the viable aphid host.  
141 Subsequently, a larva hatches and parasitises the host consuming it internally whilst the parasitoid juvenile  
142 pupates, then develops into an adult that ecloses from the dead body of the host to resume the life cycle.  
143 Immediately upon their arrival, we separated the mummies into multiple 90mm petri dishes, each dish  
144 containing a small ball of dental cotton, approximately 20mm in diameter, which was saturated in 10% sucrose  
145 solution. The petri dishes were kept in the fridge at 10°C to slow the rate of eclosion from the aphid mummy  
146 (*i.e.* the wasp puparium). The petri dishes were taken from the fridge hourly and checked for the eclosion of  
147 wasps; the gender of the emergent wasp was observed; if all the individuals were of the same sex, then they  
148 could be used in the next stage of the experiment. The females were always isolated and kept separately from

149 the males to insure the females were virgins prior to mating according to the quantitative genetic design  
150 explained below.

151

152 Intraguild predator *C. carnea* larva

153 The intraguild predator in our experiments was the aphid lion larva. The larvae were purchased from Ladybird  
154 Plant Care (UK) in tubes of approximately 300-500 individuals. The tube was emptied into a plastic container  
155 that contained some plant shoot parts with aphids as a provision and then kept in the fridge at 5°C until they  
156 were needed; this was to slow the rate of metabolism and prevent the larvae from cannibalising each other.  
157 The larvae were used within 48 hours of delivery or they were disposed of. As the wasps take ~11 days to  
158 emerge from the mummies, the aphid lion larvae (1<sup>st</sup> instars) were ordered so that they would arrive on day 10  
159 ready to be timely used where applicable in the experiment as described below.

160

### 161 *Experimental Design*

162 Haplodiploidy is the sex-determination system in the Hymenopteran parasitoid wasp *A. ervi*, meaning that  
163 males are the result of unfertilised eggs and hence haploid (1n), while females are diploid (2n) since they  
164 produced from fertilised eggs [44]. Based on Khudr et al. (2013) [21], we mated randomly selected male wasps  
165 (sires) with randomly selected female wasps (dams) to establish a quantitative genetic half-sibling design.  
166 Each of the 34 sires was mated with a minimum of three dams, dependent on wasp availability right after their  
167 eclosion. We thus established sire-dam groups. Before the wasps were mated, they were isolated into  
168 Eppendorf tubes and inspected using a magnifying glass to observe abdomens and determine their sex; the  
169 female's abdomen ends with a pronounced point (ovipositor) while the male's abdomen is more rounded. The  
170 wasps were then put into the same tube by opening both tubes and putting them end to end. Once both wasps  
171 (sire and dam) had moved into the same tube, it was sealed with a small piece of foam. The mating wasps  
172 were monitored carefully until they completed copulation to ensure the dams were inseminated by the  
173 corresponding sire. Copulation was checked to have occurred within two hours of eclosion. If copulation did  
174 not happen, the female wasps were disposed of because of the short window of time during which the  
175 otherwise arrhenotokous parthenogenetic female wasp will be usually receptive to mating [21,44]. Once  
176 copulation was complete the foam was removed, the tubes were placed end to end, and we waited for the  
177 wasps to enter separate tubes before closing the lids and labelling the sire with its unique number (S1 – Sn),  
178 and the dams with the number of the associated sire they mated with plus their own unique number in order  
179 of mating (e.g. S1 D1 – Sn Dm). Electronic supplementary material, figure S1 illustrates the experimental  
180 design.

181 Once mated, the inseminated dams were placed in their respective microcosms. The microcosms were  
182 constructed by removing the ends of a 2-litre PVC bottle and attaching one end to the plant pot and covering  
183 the other with a fine nylon mesh ('Non-Fray', Insectopia, UK). Each microcosm contained a 3-week-old broad  
184 bean plant that had been infested with 30 third instars of N116 just before putting the wasp into the enclosure.  
185 To release the dam into the microcosm the top section was held in place over the plant (leaving a small gap  
186 on one side), the lid of the tube was opened and sealed with the end of a finger and then the tube was passed  
187 through the gap onto the soil. Once the inseminated wasp was inside the microcosm, the top section of the  
188 microcosm was secured to the plant pot using 48mm wide polypropylene tape. The microcosms were placed,

189 evenly spaced, into large trays, containing a shallow layer of water, in the growth chamber for eleven days.  
190 The conditions in the chamber were 22-24°C with a 16h (light):8h (dark) photoperiod; the water level in the  
191 trays was maintained and the positions of the microcosms on the trays were randomised every other day. On  
192 the eleventh day, the microcosms were taken from the growth chamber, opened, and all the mummies present  
193 were removed from the plant and inner surfaces of the microcosm using a fine damp paintbrush. Each mummy  
194 was placed in a separate 35mm petri dish that contained a small ball of dental cotton (approximately 10mm in  
195 diameter) saturated with 10% sucrose solution and labelled with the associative sire-dam number. The petri  
196 dishes were left at room temperature on the lab bench and left until we observed eclosion. Once the progenies  
197 (sib and half-sib daughters denoting the intraspecific genetic variability of the parasitoid) had emerged from  
198 the aphid mummies, they were individually introduced into a microcosm with a 3-week-old faba bean plant that  
199 had been infested with 30 third instars of N116. The microcosms were sealed, and each of the introduced  
200 daughters (i.e. parasitoid genotype) was given 11 days to parasitise the provided aphid population leading to  
201 the production of mummies. We then censused the aphid population per microcosm (mummified and healthy)  
202 and recorded the positions of the mummies off plant versus on plant. The whole procedure was repeated for  
203 the Q1 lineage. As such, the wasp daughters (parasitoid genotype) represented the intraspecific genetic  
204 variation effects in the parasitoid wasp, whereas the within-species genetic variation in the pea aphid host was  
205 presented by the inclusion of the N116 and Q1 lineages.

206  
207 The remainder of the generated parasitoid daughters were used to test the effect of the presence of the aphid  
208 lion as an intraguild predator (IGP) on aphid traits. After the introduction of the aphids (N116 or Q1) followed  
209 by the parasitoid daughter into the microcosm, as explained above, an aphid lion second-instar larva was  
210 transferred into the microcosm, on a fine paintbrush, onto the soil a few minutes after the wasp was added.  
211 The daughters (parasitoid genotype) that arose from each of the sire x dam mating groupings were numbered  
212 and then split randomly into one of two groups: without IGP (*i.e.* IGP absent) or with IGP (*i.e.* IGP present).  
213 Once the microcosm set up was completed, they were sealed and placed back into the growth chamber for  
214 eleven days at 22-24°C with the 16h:8h photoperiod as above. The microcosms were randomised in the  
215 chamber and checked to ensure that they had enough water every other day. On the eleventh day, the  
216 microcosms were once again removed from the growth chamber, opened and the data were recorded. We  
217 recorded the total number of healthy aphids (non-mummified), the total number of mummies, and the  
218 distribution of the mummies within the microcosm (on versus off plant) Electronic supplementary material,  
219 figure S1. We were unable to create a fully factorial design with two aphid lineages and the presence or  
220 absence of a predator for each dam/sire combination. The differential survival in this multispecies system  
221 combined with the nature of the quantitative genetic design, and keeping all the parthenogenetic aphids at the  
222 same age led to unbalanced sample sizes for a given aphid lineage, which, nevertheless, is sufficiently  
223 powered for the number of replicates. Overall, there were 119 parasitoid daughters. Each group of daughters  
224 was split into two populations, with one ( $n = 73$ ) being provided with pea aphid N116 as provision, while the  
225 other ( $n = 45$ ) was provided with pea aphid Q1. Each of these two populations were further split into two  
226 groups, with one group exposed to intraguild predation by the aphid lion larva ( $n = 43$ , in the case of N116,  
227 and  $n = 15$  in the case of Q1) and the other group not ( $n = 30$ , in the case of N116, and  $n = 30$  in the case of  
228 Q1).

229

## 230 *Molecular Analysis*

231 The healthy aphids in each microcosm were preserved in a cryogenic tube at -195°C, at The University of  
232 Manchester liquid nitrogen sample storage facility, for later molecular analysis. The identification of the  
233 bacterial symbionts in the two lineages of pea aphid consisted of two parts: 1) the use of diagnostic PCR to  
234 confirm the presence or absence of the defensive symbiont *H. defensa* and 2) 16s rRNA gene sequencing for  
235 the identification of other symbionts. The aphid samples were surface-sterilised [45], then the DNA was  
236 extracted using 'Qiagen DNAEasy Blood and Tissue Kit' small insect supplementary protocol [45]. As the  
237 aphids are soft-bodied insects, we altered step 1 of the protocol slightly, rather than freezing them in liquid  
238 nitrogen and grinding them up in a pestle and mortar they were homogenised in a sterile microcentrifuge tube  
239 using a sterile disposable microcentrifuge tube homogenisation pestle. In step 3, the lysis time was increased  
240 from three to six hours and the rest of the protocol was followed with no further modifications. Subsequently,  
241 we ran a Diagnostic PCR [46]; the PCR reactions were visualised on a 1% agarose gel with SafeView Nucleic  
242 Acid Stain with Bioline HyperLadder™ 1kb. Afterwards, we ran 16s Gene Sequencing for a total of 70 samples  
243 (35 Q1 and 35 N116), which were sent for sequencing using GATC Biotech's T7 sequencing primers. Once  
244 we had received the sequence data both the vector sequences and the parts of the sequences that contained  
245 bases that were below the confidence threshold were removed. The sequences were then analysed using the  
246 NCBI 'standard nucleotide BLAST' (megablast) and the Nucleotide collection (nr/nt). The most closely related  
247 bacteria were selected based on the blast output and where they fall on the resulting distance tree of the  
248 results (Electronic supplementary materials, Molecular Analysis).

249

## 250 **Statistics**

251 The data on the parasitoid genotype with and without IGP were pooled because this enabled us to investigate  
252 the influence of the IGP on the outcome of the parasitoid genotype effect on aphid fitness (in terms of immunity  
253 to the parasitoid) and the behaviour of the aphid lineages. All statistical analyses were conducted using R [47]  
254 via RStudio [48]. Firstly, we tested the effects of parasitoid and aphid genetic variability in the absence or  
255 presence of IGP on aphid immunity ratio (IR: the proportion of aphids that was non-mummified  
256 [unparasitoidised] after 11 days of exposure to the parasitoid genotype relative to the entire population of  
257 aphids [healthy and mummified] per aphid lineage per microcosm). A generalised linear mixed effect model  
258 (Model 1) was applied with Poisson family, R packages 'car' [49] and lme4 [50]. The explanatory variables  
259 were the following fixed effects: (1) IGP (No, Yes), (2) aphid lineage (N116, Q1), (3) parasitoid intraspecific  
260 genetic variation effect (daughters' identity as per their sire x dam grouping that was the product of the  
261 quantitative genetic design), (4) the interaction (parasitoid genotype x aphid lineage), (5) the interaction (IGP  
262 x parasitoid genotype), and (6) the interaction (IGP x aphid lineage). The microcosm was modelled as a  
263 random effect. Secondly, we analysed aphid behaviour as the proportion of aphid mummies off plant relative  
264 to the total number of mummies in the microcosm, using the explanatory variables (1-4) as in Model 1, in a  
265 generalised linear model (Model 2) with a quasiPoisson family due to non-normality of the count data, R  
266 package 'multcomp' [51].

## 267 **3. Results and Discussion**

268 In this study, we investigated the effects of genetic variation in a parasitoid provided with two aphid host  
269 conspecifics (N116 and Q1) having different life histories and biotypes, on host fitness and behaviour under

270 intraguild predation. As a measure of fitness, we focussed on aphid immunity ratio (IR) that is the proportion  
271 of healthy aphids to the total population of healthy and parasitoidised individuals [mummified]), and host  
272 avoidance behaviour.

273

#### 274 *Differences in immunity between the two aphid lineages (N116 and Q1)*

275 In a pilot study, we had established that the two different clonal lineages are very different in the susceptibility  
276 to the parasitoid wasp. Based on the known effects of defensive endosymbionts, we hypothesised that the two  
277 lineages differed in the defensive endosymbiont community they host. We, therefore, conducted an assay of  
278 the endosymbionts, which revealed that, unlike the Q1 genotype, N116 harboured different endosymbionts  
279 known to confer immunity to parasitoidism by the wasp *A. ervi* (Electronic supplementary materials, Molecular  
280 Analysis). Of the 35 samples that were sequenced in the N116 clone, 26 were successful and contained a  
281 long enough sequence (590bp to 1112bp) to conduct a BLAST analysis. Of the 26 BLAST analysed samples,  
282 two were found to contain chimeric sequences and have been excluded, 13 samples matched with the known  
283 defensive secondary symbiont *H. defensa* (99.19% to 99.87% identity); a defensive secondary symbiont found  
284 throughout pea aphid lineages [52] and reported to provide immunity to parasitoidism by stopping the  
285 development of the *A. ervi* larva, and hence rescuing the aphid host [11,52]. The level of conferred immunity  
286 can vary substantially by different strains of *H. defensa* and the spread of the endosymbiont may rapidly  
287 increase, in experimental populations, with exposure to parasitoid wasps [53]. Variation in protection is further  
288 influenced by the presence or absence of infection of the bacteria with different bacteriophages called APSEs  
289 [53]. These bacteriophages are thought to encode putative toxins that function in the specific defence against  
290 *A. ervi* [14,52], which, however, we did not investigate in this study.

291 Furthermore, we also found nine samples were most closely related to *Fukatsuia symbiotica* (99% to  
292 100% identity), previously referred to as the X-type or PAXS symbiont, that, when found in association with *H.*  
293 *defensa*, provides high levels of resistance to *A. ervi* [55,56]; *F. symbiotica* and *H. defensa* were previously  
294 reported in the N116 lineage [42]. Interestingly we also found that one sequence was most closely related to  
295 *Serratia symbiotica* (99% identity), another known symbiont of aphids that provides resistance against  
296 parasitoids [11,15,57,58]. *Serratia symbiotica* has not been reported in this lineage before. Given the lack of  
297 evidence of strong immunity in pea aphids by means of encapsulating parasitoid eggs [15,16], the immunity  
298 of N116 was dependent on the presence of this set of defensive endosymbionts [13]. Still, the presence of  
299 three defensive symbionts in the N116 lineage is unusual and further work is required to understand the  
300 significance of this finding. For Q1, of the 35 samples sent for sequencing 23 were received and of sufficient  
301 quality for BLAST analysis (420bp to 967bp). Here, 20 samples positively matched with the secondary  
302 symbiont *S. symbiotica* (99% to 100% identity) but no *H. defensa* was identified, while three samples identified  
303 the primary endosymbiont *Buchnera aphidicola* (Electronic supplementary materials, Molecular Analysis).

304

#### 305 *The effects of intraspecific genetic variation in the parasitoid and the aphid on aphid immunity when intraguild* 306 *predation occurs*

307 Having established differences in endosymbiont community, we then proceeded to our full experiment in which  
308 we focussed on aphid immunity as defined above. As shown in figure 1, the overall average immunity ratio  
309 (IR) of N116 was ~65% in the absence of IGP that increased to 86% when IGP was present. By contrast, the



310 average IR of Q1 was ~20% (IGP absent) that slightly increased to ~27 when the IGP was present. Thus, IR  
311 in N116 was 3.25 times higher than in the Q1 lineage without IGP, and ~3.2 times higher with IGP. The IR was  
312 significantly affected by aphid lineage ( $F_{(1,58)} = 28.5$ ,  $P < 0.0001$ ) and parasitoid genotype ( $F_{(37,58)} = 95.76$ ,  $P <$   
313  $0.0001$ ), the interaction between aphid lineage and parasitoid genotype ( $F_{(3,58)} = 12.1$ ,  $P = 0.007$ ), and the  
314 interaction between IGP and parasitoid genotype ( $F_{(15,58)} = 37.23$ ,  $P = 0.001$ ); the IGP effect on its own was  
315 not significant (see also electronic supplementary materials, Table S1 for the model summary). We recorded  
316 total immunity (IR = 100%) to parasitoid genotype in 10 out of 30 cases for N116 versus only one case out of  
317 30 for Q1 when IGP was absent, and 24 cases out of 43 for N116 versus only one case out of 15 for Q1 when  
318 IGP was present. Conversely, for lack of immunity (IR = 0%), there were six cases out of 30 for N116 versus  
319 only 16 cases out of 30 for Q1 when IGP was absent, and four cases out of 43 for N116 versus only nine cases  
320 out of 15 for Q1 when IGP was present. See electronic supplementary materials, figures S2 and S3 for further  
321 details.

322  
323 The parasitoid was less successful in sequestering aphids as puparia when the intraguild predator was  
324 present, and that was clearly pronounced in the N116 aphid lineage, which harboured defensive symbionts.  
325 The differences in the outcome of parasitoidism were influenced by the presence of the combination of  
326 defensive symbionts in N116 rather than in the Q1 lineage. This means, therefore, that the effect of the aphid  
327 'genotype' in this work is more than the effect of the genotype alone, as it also includes the indirect factor of  
328 defensive endosymbiosis in association with the lineage. Isolates of both *S. symbiotica* and *H. defensa* have  
329 been shown to confer resistance to parasitoid wasps in the pea aphid, reducing successful parasitism by 23%  
330 and 42% accordingly [11,15]. Moreover, the occurrence of superinfected aphid clones (carrying multiple  
331 inherited symbionts), has been noted despite the apparent costs to aphid fecundity [57]. Aphids superinfected  
332 with *H. defensa* and *F. symbiotica* are known to have very high levels of resistance against *A. ervi*, up to 100%  
333 in some clones [42], and this explains the high levels of resistance in the N116 lineage. As such, the symbiosis,  
334 in this context, alters the outcome of the interaction between the parasitoid and the aphid host and thus should  
335 be considered as an important indirect ecological effect in this system [59]. We advocate that the indirect  
336 ecological effect influenced the outcome of the interspecific indirect genetic effect of the parasitoid on the  
337 reproductive success of its aphid hosts.

338 The strong and intimate interaction between the aphid host and its parasitoid may be influenced by genetic  
339 variation in the traits related to the interaction of the species involved, meeting one of the fundamental criteria  
340 for co-evolution in a host-parasitoid system [12]. At any rate, although the N116 pea aphid is one of the lineages  
341 with a known association with *H. defensa* [40,42], to the best of our knowledge, we are the first to empirically  
342 test the immunity in this lineage when an intraguild predator is present.

343  
344

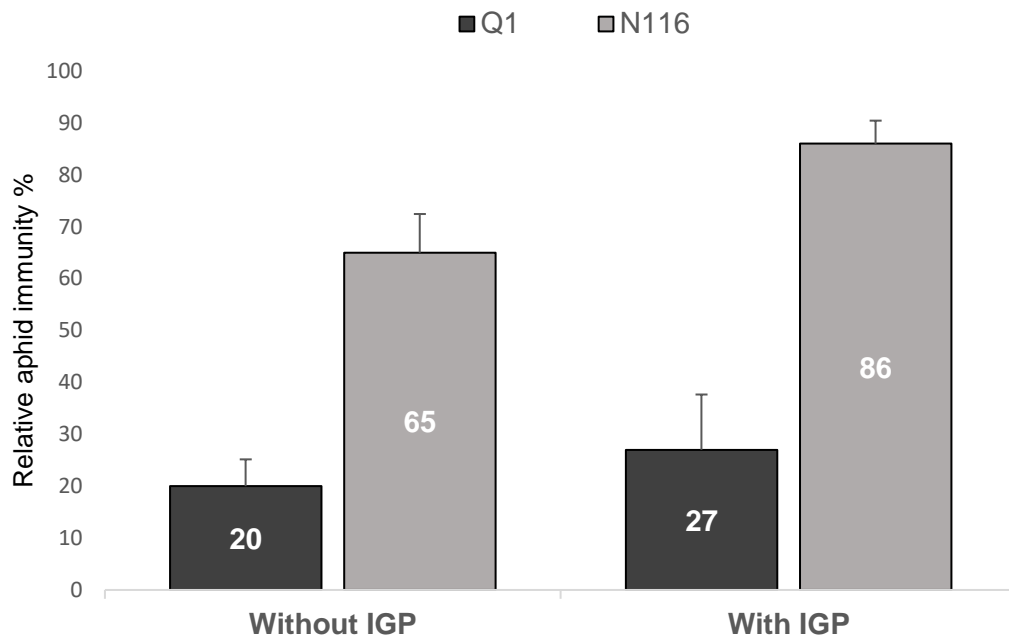

345

346

347 **Figure 1. Aphid immunity to parasitoid subject to IGP.** The means of aphid IR are proportionally shown  
348 per aphid lineage with and without IGP. Percentages of mummies recorded off the plant are shown for N116  
349 (shown in grey) and Q1 (shown in black) pea aphids under exposure to the effect of the parasitoid genotype  
350 (daughters) in the absence of IGP (n = 60 parasitoid daughters [30 in the case of N116, and 30 in the case of  
351 Q1]) and the presence of IGP (n = 58 parasitoid daughters [43 in the case of N116, and 15 in the case of Q1]).

352

### 353 *Aphid altruistic mummification behaviour*

354 Aphid mummification off plant, away from the healthy clonal population, has been interpreted as altruistic  
355 behaviour because it leads to an increased predation risk for parasitised aphids but a reduction in successfully  
356 eclosing parasitoid wasps [36,60]. Figure 2 shows that the average off-plant proportions of mummified aphids  
357 were almost identical in the case of N116 (~76%) with and without IGP. By contrast, for Q1 the average  
358 percentage was ~ 49% in the absence of IGP, and ~ 45% in presence of IGP. Parasitised N116 individuals  
359 mummified ~1.55 times more than Q1 when the IGP was absent, and ~1.69 times more in the presence of  
360 IGP. The proportion of mummies off plant were significantly affected by aphid lineage ( $LR_{\chi^2(1,49)} = 7.051$ ,  $P =$   
361  $0.008$ ) and, marginally, parasitoid genotype ( $F_{(28,49)} = 40.62$ ,  $P = 0.058$ ), but the effect of their interaction was  
362 not significant, nor was the effect of IGP. See electronic supplementary materials, Table S2 for the model  
363 summary. These results suggest that N116 (relatively highly immune to parasitoid attack owing to the  
364 defensive endosymbiont) showed a consistent propensity to desert the host plant when parasitised. Yet, the  
365 ecological effect of IGP on such a propensity was negligible. Comparatively, Q1 (with inferior immunity due to  
366 differences in their defensive symbiont communities, see above) showed less altruistic behaviour when the  
367 aphid lion was present.

368

369

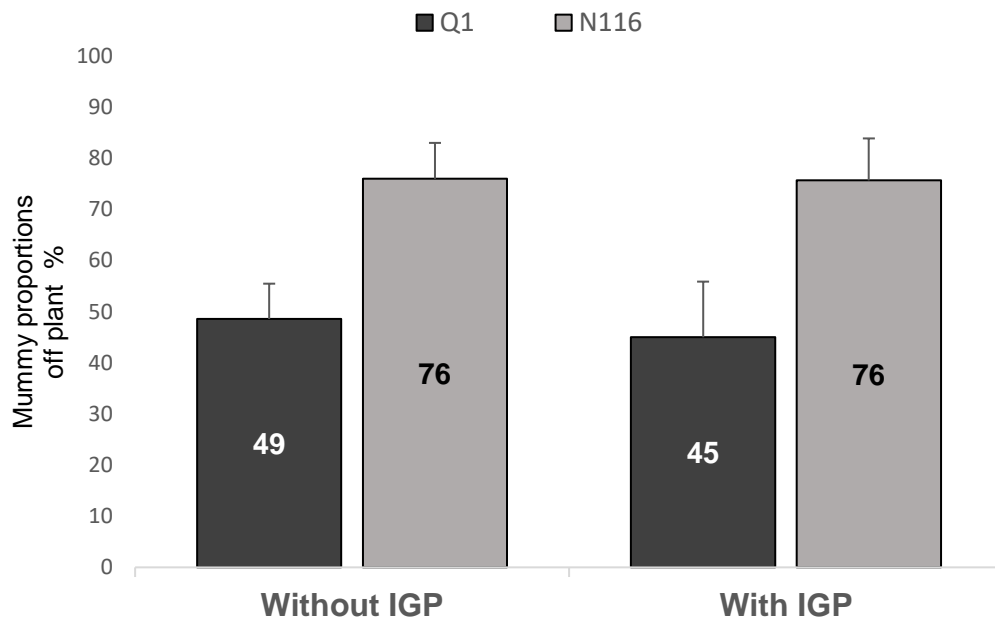

370

371 **Figure 2. Proportions of mummies off the plant.** Percentages of mummies (means) recorded off the plant  
372 are shown for N116 and Q1 pea aphids under exposure to the effect of the parasitoid genotype (daughters) in  
373 the absence of IGP (n = 49 parasitoid daughters [20 in the case of N116, and 29 in the case of Q1]) and the  
374 presence of IGP (n = 33 parasitoid daughters [19 in the case of N116, and 14 in the case of Q1]).

375

376

377 Under the life-dinner principle [61], changes in aphid population and altruistic behaviour may lead to changes  
378 in the parasitoid host-manipulative tactics and virulence, such that a decreased aphid altruistic behaviour may  
379 reduce the parasitoid loss inflicted by an intraguild predator (which shares the aphid as prey with the  
380 parasitoid). Thus, parasitoid wasps alter the behaviour [21] as well as the internal environment of the  
381 parasitised aphid to make it more favourable for wasp development and survival [62]. Our findings show that  
382 lineage-specific factors, including the absence or presence of defensive endosymbiosis influence on the  
383 location of the mummies. This indicates that the response of specific lineages of the pea aphid to the  
384 intraspecific genetic variation effects and interspecific indirect genetic effects of its parasitoid is also dependent  
385 on the aphid within-species genetic variability as well. Having more aphid mummies (wasp puparia) farther  
386 from the core of the mother clone is assumed to increase aphid inclusive fitness, but this altruistic change in  
387 mummy position is likely to be cost-sensitive and context-dependent [21,60,63-65]. It is worthy of note here  
388 that parasitoid wasps may be able to differentiate between infected and uninfected aphids, thought to be the  
389 result of a decreased production of a major component of the aphid alarm pheromone, *trans*- $\beta$ -farnesene  
390 (EBF) [62]. The alarm pheromone is secreted from cornicles when the aphids are attacked, and when aphids  
391 detect this pheromone they move away from the source, with some even dropping from the plant altogether  
392 [62]. This potential of *A. ervi* to differentiate between aphids infected with *H. defensa* and those that are not is  
393 demonstrated by an increased occurrence of superparasitism in the infected aphids. Superparasitism occurs  
394 when more than one egg is oviposited into the same aphid host and, under normal conditions, this behaviour  
395 is usually considered to be maladaptive as it results in siblicide [66]. Interestingly, the presence of *H. defensa*

396 in a host aphid may have further implications for the plant-aphid-parasitoid system as it alters the behaviour of  
397 the parasitoids [62,14]. Vorburger and Rouchet (2016) [67] suggested that there may be selection for local  
398 adaptation by parasitoids to certain strains of *H. defensa*, but this remains in need of further investigation [67].  
399 This implies that the interaction between the aphid (including the defensive symbiosis) and the parasitoid is  
400 highly context-dependent as shown in our study. Moreover, *H. defensa* is also implicated in changing aphid  
401 defensive behaviour against parasitoids [68] and in attenuating the release of herbivore-induced plant volatiles  
402 that attract parasitoid wasps [69]. This further highlights the importance of symbionts in the interactions  
403 between species [14,69] such that defensive symbionts are reported to have far-reaching ecological effects  
404 on aphid-parasitoid communities [70]. The rate of evolution of host resistance to parasitoids, as well as the  
405 infectivity (virulence) of parasitoids will be subject to the impacts of internal defensive symbionts [65,72,71]  
406 and external factors (e.g. intraguild predators) [32,33]. Altogether, these are constituents of ongoing  
407 evolutionary arms-race [31,37-39] that will depend on the levels of variation present in the populations and the  
408 associated fitness costs of the involved traits [65,72]. This is in line with the extensive effects of intra-specific  
409 genetic variation of one species on other species beyond the individual or population levels [18,19].

410

411 Our study has demonstrated the complex nature of the interaction between two lineages of a scientifically as  
412 well as economically important agricultural pest and the genotype of its parasitoid subject to the effects of  
413 intraguild predation by aphid lion. Our findings imply that having defensive endosymbiosis may contribute to  
414 aphid survival and reactions to differential parasitoid virulence that appear to be context-dependent. The  
415 influence of the presence of the intraguild predator varied across parasitoid genotypes and aphid lineages. We  
416 demonstrate the need to consider the effects of intra-specific genetic variation in host-parasitoid systems  
417 together with the ecological effects brought about by defensive endosymbiosis and other natural enemies of  
418 the aphid across trophic levels. This will help untangle the complexity of these interactions and hence design  
419 effective biological controls in agro-ecosystems.

420

#### 421 **Data accessibility**

422 The data analysed in this study are provided in the Figshare repository:

423 <https://figshare.com/s/96df54283ac09ebd39cd>

424

#### 425 **Gene Bank accession numbers**

426 N116 aphid endosymbionts: MW979375 to MW979398

427 Q1 aphid endosymbionts: MW971996 to MW972018

428

#### 429 **Competing interests**

430 We declare we have no conflict of interests

431

#### 432 **Funding**

433 N/A

434

435 **Acknowledgements**

436 We would like to thank Marco Giorda for help with data collection, and Dr Jon Pittman for general advice, and  
437 Reuben Margerison for his assistance with the 16s sequence analysis.

438

439

440 **References**

- 441 1. O'Brien A, Jack C, Friesen M, Frederickson M. 2021 Whose trait is it anyways? Coevolution of joint phenotypes  
442 and genetic architecture in mutualisms. *Proc. R. Soc. B* **288**, p.20202483. (doi: 10.1098/rspb.2020.2483)
- 443 2. Moore J. 2002 *Parasites and the behavior of animals*. Oxford: Oxford University Press.
- 444 3. Thomas F. et al. 2011 Intraspecific variability in host manipulation by parasites. *Infect. Genet. Evol.* **11**, 262–  
445 269. (doi: DOI: 10.1016/j.meegid.2010.12.013)
- 446 4. Poulin R. 2011 *Evolutionary ecology of parasites* (Princeton University Press).
- 447 5. Godfray H. 1994 *Parasitoids: behavioral and evolutionary ecology*. Princeton: Princeton University Press.
- 448 6. Quicke D. 2014. Idiobionts, koinobionts and other life history traits. In *The braconid and Ichneumonid parasitoid*  
449 *wasps: Biology, systematics, evolution and ecology*, (ed D. Quicke ), PP. 87–105. John Wiley & Sons (doi:  
450 10.1002/9781118907085.ch6)
- 451 7. Sandhi R, Reddy G. 2020 Biology, ecology, and management strategies for pea aphid (Hemiptera: Aphididae)  
452 in pulse crops. *J. Integr. Pest Manag.* **11**, 18. (doi: 10.1093/jipm/pmaa016)
- 453 8. Thompson J. 1994 *The coevolutionary process*. Chicago: University of Chicago Press.
- 454 9. Hufbauer R. 2001 Pea aphid–parasitoid interactions: have parasitoids adapted to differential resistance?  
455 *Ecology* **82**, 717–725. (doi: 10.2307/2680191)
- 456 10. Vinson S. 1990 How parasitoids deal with the immune system of their host: an overview. *Arch. Insect Biochem.*  
457 *Physiol.* **13**, 3–27. (doi: 10.1002/arch.940130103)
- 458 11. Oliver K, Moran N, Hunter M. 2005 Variation in resistance to parasitism in aphids is due to symbionts not host  
459 genotype. *PNAS* **102**, 12795–12800. (doi: 10.1073/pnas.0506131102)
- 460 12. Henter H, Via S. 1995. The potential for coevolution in a host-parasitoid system. I. Genetic variation within an  
461 aphid population in susceptibility to a parasitic wasp. *Evolution* **49**, 427–438. (doi: 10.1111/j.1558-  
462 5646.1995.tb02275.x)
- 463 13. Martinez A, Doremus M, Kraft L, Kim K, Oliver K. 2018 Multi-modal defences in aphids offer redundant  
464 protection and increased costs likely impeding a protective mutualism. *J Anim. Ecol.* **87**, 464–477. (doi:  
465 10.1111/1365-2656.12675)
- 466 14. Oliver K, Higashi C. 2018 Variations on a protective theme: *Hamiltonella defensa* infections in aphids variably  
467 impact parasitoid success. *Curr. Opin. Insect. Sci.* **32**, 1–7 (doi: 10.1016/j.cois.2018.08.009)
- 468 15. Oliver K, Russell J, Moran N, Hunter M. 2003 Facultative bacterial symbionts in aphids confer resistance to  
469 parasitic wasps. *PNAS* **100**, 1803–1807. (doi: 10.1073/pnas.0335320100)
- 470 16. Kraft L, Kopco J, Harmon J, Oliver K. 2017 Aphid symbionts and endogenous resistance traits mediate  
471 competition between rival parasitoids. *PloS One* **12**: e0180729. (doi: 10.1371/journal.pone.0190763)
- 472 17. Doremus M, Oliver K. 2017 Aphid heritable symbiont exploits defensive mutualism. *Appl. Environ. Microbiol.*  
473 **83** (8) e03276-16. (doi: 10.1128/AEM.03276-16)
- 474 18. Whitham T. et al. 2003. Community and ecosystem genetics: a consequence of the extended phenotype.  
475 *Ecology*, **84**, 559–573. (doi: 10.1890/0012-9658(2003)084[0559:CAEGAC]2.0.CO;2)
- 476 19. Khudr MS, Purkiss S, Hager R. 2018 Indirect ecological effects interact with community genetic effects in a  
477 host–parasite system and dramatically reduce parasite burden. *Proc. R. Soc. B* **285**, p.20180891. (doi:  
478 10.1098/rspb.2018.0891)
- 479 20. Hufbauer R, Via S. 1999 Evolution of an aphid-parasitoid interaction: variation in resistance to parasitism  
480 among aphid populations specialized on different plants. *Evolution* **53**, 1435–1445. (doi: 10.1111/j.1558-  
481 5646.1999.tb05408.x)
- 482 21. Khudr MS, Oldekop J, Shuker D, Preziosi R. 2013. Parasitoid wasps influence where aphids die via an  
483 interspecific indirect genetic effect. *Biol. Lett.* **9**, 20121151. (doi: 10.1098/rsbl.2012.1151)
- 484 22. Martinez A, Kim K, Harmon J, Oliver K. 2016 specificity of multi-modal aphid defenses against two rival  
485 parasitoids. *PLoS ONE* **11**: e0154670. (doi: 10.1371/journal.pone.0154670)

- 486 23. Wolf J B, Brodie III E, Cheverud J, Moore A, Wade M. 1998. Evolutionary consequences of indirect genetic  
487 effects. *Trends Ecol. Evol.* **13**, 64–69. (doi: 10.1016/S0169-5347(97)01233-0)
- 488 24. Trubenová B, Novak S, Hager R. 2015 Indirect genetic effects and the dynamics of social interactions. *PLoS*  
489 *One*, **10**: p.e0126907. (doi: 10.1371/journal.pone.0126907)
- 490 25. Moore A, Brodie III E., Wolf J B. 1997 Interacting phenotypes and the evolutionary process: I. Direct and  
491 indirect genetic effects of social interactions. *Evolution* **51**, 1352–1362. (doi: 10.1111/j.1558-  
492 5646.1997.tb01458.x)
- 493 26. Wolf J. 2000. Indirect genetic effects and gene interactions. In *Epistasis and the evolutionary process* (eds  
494 Wolf J, E Brodie, M Wade), pp. 158–176. Oxford: Oxford University Press.
- 495 27. Lapchin L, Guillemaud T. 2005 Asymmetry in host and parasitoid diffuse coevolution: when the red queen has  
496 to keep a finger in more than one pie. *Front. Zool.* **2**, 4 (doi: 10.1186/1742-9994-2-4)
- 497 28. Wilfert L, Jiggins F. 2013 The dynamics of reciprocal selective sweeps of host resistance and a parasite  
498 counter-adaptation in *Drosophila*. *Evolution* **67**, 761–773. (doi: 10.1111/j.1558-5646.2012.01832.x)
- 499 29. Gandon S, Buckling A, Decaestecker E, Day T. 2008 Host–parasite coevolution and patterns of adaptation  
500 across time and space. *J. Evol. Biol.* **21**, 1861–1866. (doi: 10.1111/j.1420-9101.2008.01598.x)
- 501 30. Vorburger C, Rouchet R 2016 Are aphid parasitoids locally adapted to the prevalence of defensive symbionts  
502 in their hosts? *BMC Evol. Biol.* **16**, 271. (doi: 10.1186/s12862-016-0811-0)
- 503 31. Dawkins R, Krebs R 1979 Arms races between and within species. *Proc. R. Soc. B* **205**, 489–511. (doi:  
504 10.1098/rspb.1979.0081)
- 505 32. Rocca M, Messelink G. 2016 Combining lacewings and parasitoids for biological control of foxglove aphids in  
506 sweet pepper. *J. App. Entomol.* **141**, 402–410. (doi: 10.1111/jen.12355)
- 507 33. Khudr MS, Fliegner L, Buzhdygan O, Wurst S. 2020 Super-predation and intraguild interactions in a multi-  
508 predator-one-prey system alter the abundance and behaviour of green peach aphid (Hemiptera: Aphididae). *Can.*  
509 *Entomol.* **152**, 200–223. (doi: 10.4039/tce.2020.7)
- 510 34. Polis G, Myers C, Holt R. 1989 The ecology and evolution of intraguild predation: potential competitors that  
511 eat each other. *Annu. Rev. Ecol. Evol. Syst.* **20**, 297–330. (doi: 10.1146/annurev.es.20.110189.001501)
- 512 35. McAllister M, Roitberg B. 1987 Adaptive suicidal behaviour in pea aphids. *Nature* **328**, 797–799 (1987). (doi:  
513 10.1038/328797b0)
- 514 36. Humphreys R, Ruxton G. 2019 Adaptive suicide: is a kin-selected driver of fatal behaviours likely? *Biol. Lett.*  
515 **15**, p.20180823. (doi: 10.1098/rsbl.2018.0823)
- 516 37. Strauss S, Sahli H, Conner J. 2004. Toward a more trait-centered approach to diffuse (co)evolution. *New*  
517 *Phytol.* **165**, 81–90. (doi: 10.1111/j.1469-8137.2004.01228.x)
- 518 38. Langerhans R. 2008 Coevolution. *Encyclopedia of Ecology*, pp. 644–648. (doi: 10.1016/B978-008045405-  
519 4.00471-7)
- 520 39. Johnson S. 2010 The pollination niche and its role in the diversification and maintenance of the southern  
521 African flora. *Philos Trans R Soc Lond B Biol Sci.* **365**, 499–516. (doi: 10.1098/rstb.2009.0243)
- 522 40. Kanvil S, Powell G, Turnbull C. 2014 Pea aphid biotype performance on diverse Medicago host genotypes  
523 indicates highly specific virulence and resistance functions. *Bull. Entomol. Res.* **104**, 689–701. (doi:  
524 10.1017/S0007485314000443)
- 525 41. Peccoud J, Ollivier A, Plantegenest M, Simon J. 2009 A continuum of genetic divergence from sympatric host  
526 races to species in the pea aphid complex. *PNAS* **106**, 7495–7500. (doi: 10.1073/pnas.0811117106)
- 527 42. Guay J-F, Boudreault S, Michaud D, Cloutier C. 2009 Impact of environmental stress on aphid clonal  
528 resistance to parasitoids: role of *Hamiltonella defensa* bacterial symbiosis in association with a new facultative  
529 symbiont of the pea aphid. *J. Insect Physiol.* **55**, 919–926. (doi: 10.1016/j.jinsphys.2009.06.006)
- 530 43. Breed M, Moore J. 2015 *Animal behaviour*. 2<sup>nd</sup> edition. Amsterdam: Elsevier. (doi: 10.1016/C2013-0-14008-1)
- 531 44. He X, Wang Q. 2008 Reproductive strategies of *Aphidius ervi* Haliday (Hymenoptera: Aphidiidae). *Biol.*  
532 *Control*, **45**, 281–287. (doi: 10.1016/j.biocontrol.2008.03.003)
- 533 45. QIAGEN. 2006 QIAGEN Supplementary protocol: purification of total DNA from insects using the DNeasy®  
534 Blood & Tissue Kit.
- 535 46. Henry L. *et al.* 2013 Horizontally transmitted symbionts and host colonization of ecological niches. *Curr. Biol.*  
536 **23**, 1713–1717. (doi: 10.1016/j.cub.2013.07.029)
- 537 47. R Core team. (2017) R: A language and environment for statistical computing. R Foundation for Statistical  
538 Computing, Vienna, Austria. URL <http://www.R-project.org/>

- 539 48.RStudio Team. 2015 *RStudio: integrated development for R*. RStudio. PBC, Boston, MA.  
540 <http://www.rstudio.com/>
- 541 49.Fox J, Weisberg S. 2019 *An R companion to applied regression*, 3<sup>rd</sup> edition. Thousand Oaks CA: Sage.  
542 <https://socialsciences.mcmaster.ca/jfox/Books/Companion/>
- 543 50.Bates D, Mächler M, Bolker B, Walker S. 2015 Fitting linear mixed-effects models using lme4. *J. Stat. Softw.*  
544 **67**, 1–48. (doi: 10.18637/jss.v067.i01).
- 545 51.Hothorn T, Bretz F, Westfall P. 2008 Simultaneous inference in general parametric models. *Biom. J.* **50**, 346–  
546 363. (doi: 10.1002/bimj.200810425)
- 547 52.Degnan P, Moran N. 2008 Diverse phage-encoded toxins in a protective insect endosymbiont. *App. Env. Microbiol.* **74**, 6782–6791. (doi: 10.1128/AEM.01285-08)
- 549 53.Oliver K, Degnan P, Hunter M, Moran N. 2009 Bacteriophages encode factors required for protection in a  
550 symbiotic mutualism. *Science* **325**, 992–994. (doi: 10.1126/science.1174463)
- 551 54.Brandt J, Chevignon G, Oliver K, Strand M. 2017 Culture of an aphid heritable symbiont demonstrates its direct  
552 role in defence against parasitoids. *Proc. R. Soc. B* **284**, 20171925. (doi: 10.1098/rspb.2017.1925)
- 553 55.Bilodeau E, Simon J-C, Guay J-F, Turgeon J, Cloutier C. 2013 Does variation in host plant association and  
554 symbiont infection of pea aphid populations induce genetic and behaviour differentiation of its main parasitoid,  
555 *Aphidius ervi*? *Evol. Ecol.* **27**, 165–184. (doi: 10.1007/s10682-012-9577-z)
- 556 56.Manzano-Marín A, Szabó G, Simon J, Horn M, Latorre A. 2017 Happens in the best of subfamilies:  
557 establishment and repeated replacements of co-obligate secondary endosymbionts within Lachninae aphids.  
558 *Environ. Microbiol.* **19**, 393–408. (doi: 10.1111/1462-2920.13633)
- 559 57.Oliver K, Moran N, Hunter M. 2006 Costs and benefits of a superinfection of facultative symbionts in aphids.  
560 *Proc. R. Soc. B* **273**, 1273–1280. (doi: 10.1098/rspb.2005.3436)
- 561 58.Oliver K, Campos J, Moran N, Hunter M. 2007 Population dynamics of defensive symbionts in aphids. *Proc.*  
562 *R. Soc. B* **275**, 293–299. (doi: 10.1098/rspb.2007.1192)
- 563 59.Wootton J. 1994 The nature and consequences of indirect effects in ecological communities. *Annu. Rev. Ecol.*  
564 *Evol. Syst.* **25**, 443–466. (doi: 10.1146/annurev.es.25.110194.002303)
- 565 60.McAllister M, Roitberg B, Weldon K. 1990 Adaptive suicide in pea aphids: decisions are cost sensitive. *Anim.*  
566 *Behav.* **40**, 167–175. (doi: 10.1016/S0003-3472(05)80676-1)
- 567 61.Brodie III E, Brodie E. 1999 Predator-prey arms races: Asymmetrical selection on predators and prey may be  
568 reduced when prey are dangerous. *BioScience* **49**, 557–568. (doi: 10.2307/1313476)
- 569 62.Oliver K *et al.* 2012 Parasitic wasp responses to symbiont-based defense in aphids. *BMC Biol.* **10**, 11. (doi:  
570 10.1186/1741-7007-10-11)
- 571 63.Trail D. 1980 Behavioral interactions between parasites and hosts: host suicide and the evolution of complex  
572 life cycles. *Am. Nat.* **116**, 77–91. (doi: 10.1086/283612)
- 573 64.Brodeur J, McNeil J. 1989 Seasonal microhabitat selection by an endoparasitoid through adaptive modification  
574 of host behavior. *Science* **244**, 226. (doi: 10.1126/science.244.4901.226)
- 575 65.Carius H, Little T, Ebert D. 2001 Genetic variation in a host-parasite association: potential for coevolution and  
576 frequency-dependent selection. *Evolution* **55**, 1136–1145. (doi: 10.1111/j.0014-3820.2001.tb00633.x)
- 577 66.Mackauer M, Chau A. 2001 Adaptive self superparasitism in a solitary parasitoid wasp: the influence of clutch  
578 size on offspring size. *Funct. Ecol.* **15**, 335–343. (doi: 10.1046/j.1365-2435.2001.00532.x)
- 579 67.Vorburger C, Perlman S. 2018 The role of defensive symbionts in host–parasite coevolution. *Biol. Rev.* **93**,  
580 1747–1765. (doi: 10.1111/brv.12417)
- 581 68.Dion E, Polin S, Simon J, Outreman Y. 2011 Symbiont infection affects aphid defensive behaviours. *Biol. Lett.*  
582 **7**, 743–746. (doi: 10.1098/rsbl.2011.0249)
- 583 69.Frago E, Mala M, Weldegergis B. *et al.* 2017 Symbionts protect aphids from parasitic wasps by attenuating  
584 herbivore-induced plant volatiles. *Nat. Commun.* **8**, 1860. (doi: 10.1038/s41467-017-01935-0)
- 585 70.Sanders D. *et al.* 2016 Defensive insect symbiont leads to cascading extinctions and community collapse.  
586 *Ecol. Lett.* **19**, 789–799. (doi: 10.1111/ele.12616)
- 587 71.Käch H, Mathé-Hubert H, Dennis A, Vorburger C. 2017 Rapid evolution of symbiont-mediated resistance  
588 compromises biological control of aphids by parasitoids. *Evol. Appl.* **11**, 220–230. (doi: 10.1111/eva.12532)
- 589 72.Ferrari J, Müller C, Kraaijeveld A, Godfray H. 2001 Clonal variation and covariation in aphid resistance to  
590 parasitoids and a pathogen. *Evolution* **55**, 1805–1814. (doi: 10.1111/j.0014-3820.2001.tb00829.x)
